# Supplementary material
Source: PubMed Central journal article supplement (PMC4351715)

**A**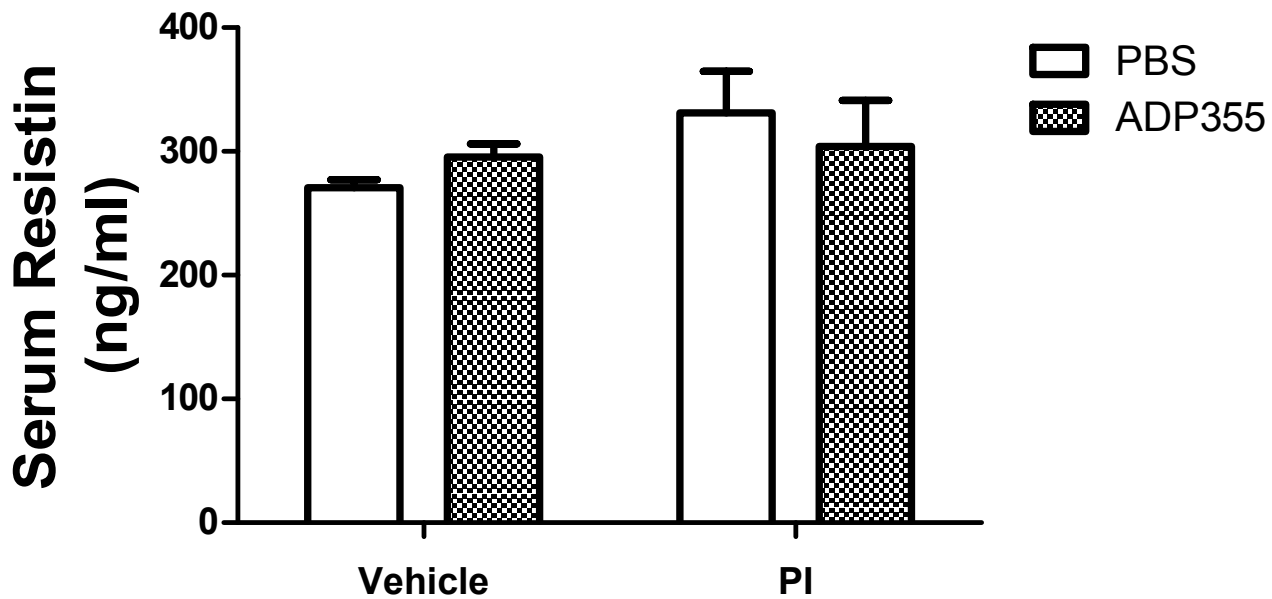**B**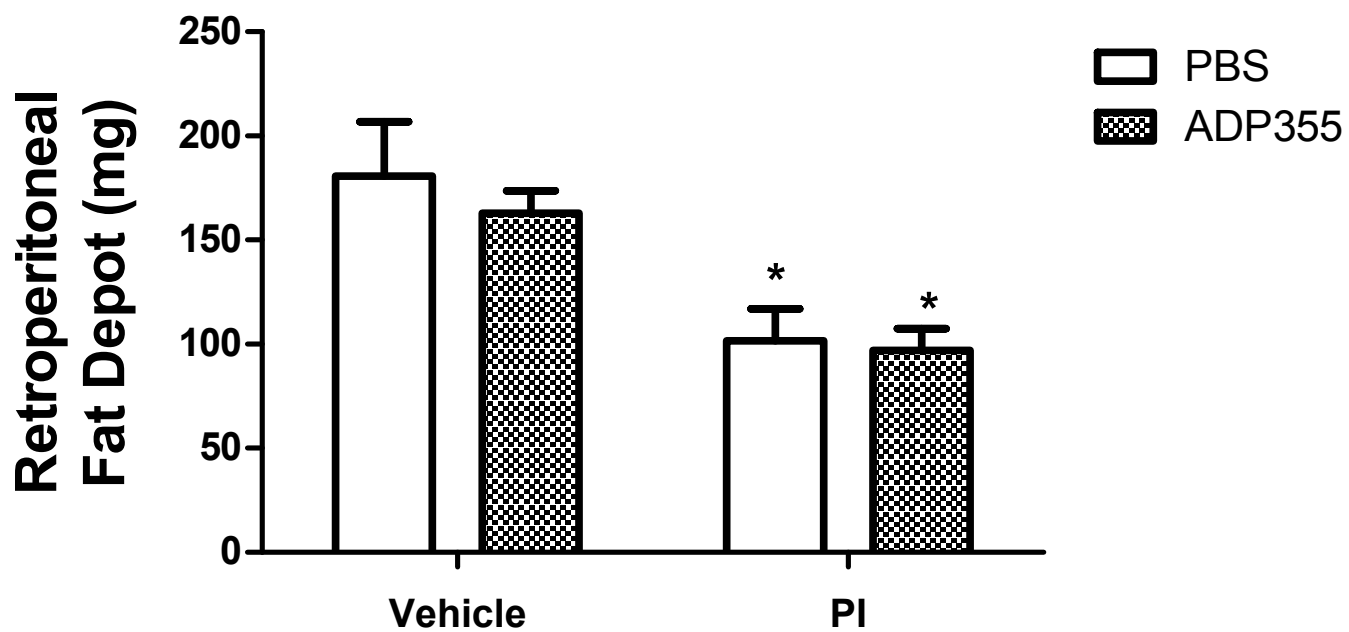

Supplement: NIHMS663805-supplement-1.pdf [file NIHMS663805-supplement-1.pdf]
